# Supplementary material for: Small sight—Big might: Economic impact of bird tourism shows opportunities for rural communities and biodiversity conservation
Source: PubMed Central journal article supplement (PMC9258859; doi:10.1371/journal.pone.0268594), 2022-07-06
Supplement: pone.0268594.s005.pdf [file pone.0268594.s005.pdf]

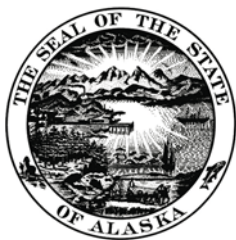

# Alaska Visitor Statistics Program 7

State of Alaska  
Department of Commerce, Community,  
& Economic Development

|                                                                                                                                                                                                                                |                                                                                                                                                                                                                         |                                                                                                                                                                                                                                           |                                                                                                                                                                          |
|--------------------------------------------------------------------------------------------------------------------------------------------------------------------------------------------------------------------------------|-------------------------------------------------------------------------------------------------------------------------------------------------------------------------------------------------------------------------|-------------------------------------------------------------------------------------------------------------------------------------------------------------------------------------------------------------------------------------------|--------------------------------------------------------------------------------------------------------------------------------------------------------------------------|
| <b>A. Interviewer Name:</b> _____                                                                                                                                                                                              |                                                                                                                                                                                                                         | <b>B. Date:</b> _____                                                                                                                                                                                                                     |                                                                                                                                                                          |
| <b>C. Mode and Location</b>                                                                                                                                                                                                    |                                                                                                                                                                                                                         |                                                                                                                                                                                                                                           |                                                                                                                                                                          |
| <b>DOMESTIC AIR</b><br>01 <input type="checkbox"/> Anchorage<br>02 <input type="checkbox"/> Fairbanks<br>03 <input type="checkbox"/> Juneau<br>04 <input type="checkbox"/> Ketchikan<br>05 <input type="checkbox"/> Sitka<br>↓ | <b>INTERNATIONAL AIR</b><br>06 <input type="checkbox"/> Anchorage<br>07 <input type="checkbox"/> Fairbanks<br><b>FERRY</b><br>08 <input type="checkbox"/> to Bellingham<br>09 <input type="checkbox"/> to Prince Rupert | <b>CRUISE SHIP</b><br>10 <input type="checkbox"/> Ketchikan<br>↓<br><div style="border: 1px solid black; padding: 2px; width: fit-content; margin: 0 auto;"> <b>D. Ship Name</b> </div>                                                   | <b>HIGHWAY</b> →<br>11 <input type="checkbox"/> Alcan<br>12 <input type="checkbox"/> Taylor<br>13 <input type="checkbox"/> Skagway<br>14 <input type="checkbox"/> Haines |
|                                                                                                                                                                                                                                |                                                                                                                                                                                                                         | <b>E. Vehicle Type</b><br>01 <input type="checkbox"/> RV/camper<br>02 <input type="checkbox"/> Car/truck/van<br>03 <input type="checkbox"/> Motorcoach/bus<br>04 <input type="checkbox"/> Motorcycle<br>05 <input type="checkbox"/> Other |                                                                                                                                                                          |
| <b>F. Airline and Flight #</b> _____                                                                                                                                                                                           |                                                                                                                                                                                                                         | <b>G. Refusals</b> _____                                                                                                                                                                                                                  |                                                                                                                                                                          |

**1. What was the main purpose for this trip?** (Read 1-5)

- |                                                        |                                                                          |
|--------------------------------------------------------|--------------------------------------------------------------------------|
| <input type="checkbox"/> Vacation/pleasure             | <input type="checkbox"/> Business and pleasure                           |
| <input type="checkbox"/> Visiting friends or relatives | <input type="checkbox"/> Seasonal worker or student → <b>DISCONTINUE</b> |
| <input type="checkbox"/> Business                      | (seasonal work includes commercial fishing, guiding, oil field work)     |

**2. Which state or country are you visiting from?**

|                                                                                                                                                                                                                                                                                                                                                                                                                                                                                                                                                                                                                                                                                                                                                                                                                                                                                                                                                                                                                                                                                                                                                                                                                                                                                                                                                                                                                                                                                                                                                                                                                                                                                                                                                                                                                                                                                                                                                                                                                                                                                                                                                                                                                                                                                                                                                                                                                                                                                                                                                                                                                                                          |                                           |                                            |                                              |                                            |                                     |                                    |                                           |                                       |                                       |                                      |                                        |                                    |                                        |                                       |                                        |                                   |                                      |                                      |                                      |                                     |                                         |                                           |                                            |                                      |                                      |                                      |                                          |                                        |                                     |                                      |                                         |                                              |                                     |                                       |                                      |                                           |                                    |                                         |                                    |                                       |                                   |                                      |                                          |                                     |                                      |                                     |                                          |  |                                     |                                      |                                            |  |                                                                                                                                                                                                                                                                                                                                                                                                                                                                                                                                                                                                                                             |
|----------------------------------------------------------------------------------------------------------------------------------------------------------------------------------------------------------------------------------------------------------------------------------------------------------------------------------------------------------------------------------------------------------------------------------------------------------------------------------------------------------------------------------------------------------------------------------------------------------------------------------------------------------------------------------------------------------------------------------------------------------------------------------------------------------------------------------------------------------------------------------------------------------------------------------------------------------------------------------------------------------------------------------------------------------------------------------------------------------------------------------------------------------------------------------------------------------------------------------------------------------------------------------------------------------------------------------------------------------------------------------------------------------------------------------------------------------------------------------------------------------------------------------------------------------------------------------------------------------------------------------------------------------------------------------------------------------------------------------------------------------------------------------------------------------------------------------------------------------------------------------------------------------------------------------------------------------------------------------------------------------------------------------------------------------------------------------------------------------------------------------------------------------------------------------------------------------------------------------------------------------------------------------------------------------------------------------------------------------------------------------------------------------------------------------------------------------------------------------------------------------------------------------------------------------------------------------------------------------------------------------------------------------|-------------------------------------------|--------------------------------------------|----------------------------------------------|--------------------------------------------|-------------------------------------|------------------------------------|-------------------------------------------|---------------------------------------|---------------------------------------|--------------------------------------|----------------------------------------|------------------------------------|----------------------------------------|---------------------------------------|----------------------------------------|-----------------------------------|--------------------------------------|--------------------------------------|--------------------------------------|-------------------------------------|-----------------------------------------|-------------------------------------------|--------------------------------------------|--------------------------------------|--------------------------------------|--------------------------------------|------------------------------------------|----------------------------------------|-------------------------------------|--------------------------------------|-----------------------------------------|----------------------------------------------|-------------------------------------|---------------------------------------|--------------------------------------|-------------------------------------------|------------------------------------|-----------------------------------------|------------------------------------|---------------------------------------|-----------------------------------|--------------------------------------|------------------------------------------|-------------------------------------|--------------------------------------|-------------------------------------|------------------------------------------|--|-------------------------------------|--------------------------------------|--------------------------------------------|--|---------------------------------------------------------------------------------------------------------------------------------------------------------------------------------------------------------------------------------------------------------------------------------------------------------------------------------------------------------------------------------------------------------------------------------------------------------------------------------------------------------------------------------------------------------------------------------------------------------------------------------------------|
| <b>U.S. (2b)</b><br><table style="width: 100%;"> <tr> <td>01 <input type="checkbox"/> Alabama</td> <td>15 <input type="checkbox"/> Iowa</td> <td>28 <input type="checkbox"/> Nevada</td> <td>41 <input type="checkbox"/> South Dakota</td> </tr> <tr> <td>03 <input type="checkbox"/> Arizona</td> <td>16 <input type="checkbox"/> Kansas</td> <td>29 <input type="checkbox"/> New Hampshire</td> <td>42 <input type="checkbox"/> Tennessee</td> </tr> <tr> <td>04 <input type="checkbox"/> Arkansas</td> <td>17 <input type="checkbox"/> Kentucky</td> <td>30 <input type="checkbox"/> New Jersey</td> <td>43 <input type="checkbox"/> Texas</td> </tr> <tr> <td>05 <input type="checkbox"/> California</td> <td>18 <input type="checkbox"/> Louisiana</td> <td>31 <input type="checkbox"/> New Mexico</td> <td>44 <input type="checkbox"/> Utah</td> </tr> <tr> <td>06 <input type="checkbox"/> Colorado</td> <td>19 <input type="checkbox"/> Maine</td> <td>32 <input type="checkbox"/> New York</td> <td>45 <input type="checkbox"/> Vermont</td> </tr> <tr> <td>07 <input type="checkbox"/> Connecticut</td> <td>20 <input type="checkbox"/> Massachusetts</td> <td>33 <input type="checkbox"/> North Carolina</td> <td>46 <input type="checkbox"/> Virginia</td> </tr> <tr> <td>08 <input type="checkbox"/> Delaware</td> <td>21 <input type="checkbox"/> Maryland</td> <td>34 <input type="checkbox"/> North Dakota</td> <td>47 <input type="checkbox"/> Washington</td> </tr> <tr> <td>09 <input type="checkbox"/> Florida</td> <td>22 <input type="checkbox"/> Michigan</td> <td>35 <input type="checkbox"/> Ohio</td> <td>48 <input type="checkbox"/> Washington, D.C.</td> </tr> <tr> <td>10 <input type="checkbox"/> Georgia</td> <td>23 <input type="checkbox"/> Minnesota</td> <td>36 <input type="checkbox"/> Oklahoma</td> <td>49 <input type="checkbox"/> West Virginia</td> </tr> <tr> <td>11 <input type="checkbox"/> Hawaii</td> <td>24 <input type="checkbox"/> Mississippi</td> <td>37 <input type="checkbox"/> Oregon</td> <td>50 <input type="checkbox"/> Wisconsin</td> </tr> <tr> <td>12 <input type="checkbox"/> Idaho</td> <td>25 <input type="checkbox"/> Missouri</td> <td>38 <input type="checkbox"/> Pennsylvania</td> <td>51 <input type="checkbox"/> Wyoming</td> </tr> <tr> <td>13 <input type="checkbox"/> Illinois</td> <td>26 <input type="checkbox"/> Montana</td> <td>39 <input type="checkbox"/> Rhode Island</td> <td></td> </tr> <tr> <td>14 <input type="checkbox"/> Indiana</td> <td>27 <input type="checkbox"/> Nebraska</td> <td>40 <input type="checkbox"/> South Carolina</td> <td></td> </tr> </table> | 01 <input type="checkbox"/> Alabama       | 15 <input type="checkbox"/> Iowa           | 28 <input type="checkbox"/> Nevada           | 41 <input type="checkbox"/> South Dakota   | 03 <input type="checkbox"/> Arizona | 16 <input type="checkbox"/> Kansas | 29 <input type="checkbox"/> New Hampshire | 42 <input type="checkbox"/> Tennessee | 04 <input type="checkbox"/> Arkansas  | 17 <input type="checkbox"/> Kentucky | 30 <input type="checkbox"/> New Jersey | 43 <input type="checkbox"/> Texas  | 05 <input type="checkbox"/> California | 18 <input type="checkbox"/> Louisiana | 31 <input type="checkbox"/> New Mexico | 44 <input type="checkbox"/> Utah  | 06 <input type="checkbox"/> Colorado | 19 <input type="checkbox"/> Maine    | 32 <input type="checkbox"/> New York | 45 <input type="checkbox"/> Vermont | 07 <input type="checkbox"/> Connecticut | 20 <input type="checkbox"/> Massachusetts | 33 <input type="checkbox"/> North Carolina | 46 <input type="checkbox"/> Virginia | 08 <input type="checkbox"/> Delaware | 21 <input type="checkbox"/> Maryland | 34 <input type="checkbox"/> North Dakota | 47 <input type="checkbox"/> Washington | 09 <input type="checkbox"/> Florida | 22 <input type="checkbox"/> Michigan | 35 <input type="checkbox"/> Ohio        | 48 <input type="checkbox"/> Washington, D.C. | 10 <input type="checkbox"/> Georgia | 23 <input type="checkbox"/> Minnesota | 36 <input type="checkbox"/> Oklahoma | 49 <input type="checkbox"/> West Virginia | 11 <input type="checkbox"/> Hawaii | 24 <input type="checkbox"/> Mississippi | 37 <input type="checkbox"/> Oregon | 50 <input type="checkbox"/> Wisconsin | 12 <input type="checkbox"/> Idaho | 25 <input type="checkbox"/> Missouri | 38 <input type="checkbox"/> Pennsylvania | 51 <input type="checkbox"/> Wyoming | 13 <input type="checkbox"/> Illinois | 26 <input type="checkbox"/> Montana | 39 <input type="checkbox"/> Rhode Island |  | 14 <input type="checkbox"/> Indiana | 27 <input type="checkbox"/> Nebraska | 40 <input type="checkbox"/> South Carolina |  | <b>Canada (2c) → Which province or territory?</b><br>01 <input type="checkbox"/> Alberta<br>02 <input type="checkbox"/> British Columbia<br>03 <input type="checkbox"/> Manitoba<br>04 <input type="checkbox"/> New Brunswick<br>05 <input type="checkbox"/> Newfoundland/Labrador<br>06 <input type="checkbox"/> Northwest Territories<br>07 <input type="checkbox"/> Nova Scotia<br>08 <input type="checkbox"/> Nunavut<br>09 <input type="checkbox"/> Ontario<br>10 <input type="checkbox"/> Prince Edward Island<br>11 <input type="checkbox"/> Quebec<br>12 <input type="checkbox"/> Saskatchewan<br>13 <input type="checkbox"/> Yukon |
| 01 <input type="checkbox"/> Alabama                                                                                                                                                                                                                                                                                                                                                                                                                                                                                                                                                                                                                                                                                                                                                                                                                                                                                                                                                                                                                                                                                                                                                                                                                                                                                                                                                                                                                                                                                                                                                                                                                                                                                                                                                                                                                                                                                                                                                                                                                                                                                                                                                                                                                                                                                                                                                                                                                                                                                                                                                                                                                      | 15 <input type="checkbox"/> Iowa          | 28 <input type="checkbox"/> Nevada         | 41 <input type="checkbox"/> South Dakota     |                                            |                                     |                                    |                                           |                                       |                                       |                                      |                                        |                                    |                                        |                                       |                                        |                                   |                                      |                                      |                                      |                                     |                                         |                                           |                                            |                                      |                                      |                                      |                                          |                                        |                                     |                                      |                                         |                                              |                                     |                                       |                                      |                                           |                                    |                                         |                                    |                                       |                                   |                                      |                                          |                                     |                                      |                                     |                                          |  |                                     |                                      |                                            |  |                                                                                                                                                                                                                                                                                                                                                                                                                                                                                                                                                                                                                                             |
| 03 <input type="checkbox"/> Arizona                                                                                                                                                                                                                                                                                                                                                                                                                                                                                                                                                                                                                                                                                                                                                                                                                                                                                                                                                                                                                                                                                                                                                                                                                                                                                                                                                                                                                                                                                                                                                                                                                                                                                                                                                                                                                                                                                                                                                                                                                                                                                                                                                                                                                                                                                                                                                                                                                                                                                                                                                                                                                      | 16 <input type="checkbox"/> Kansas        | 29 <input type="checkbox"/> New Hampshire  | 42 <input type="checkbox"/> Tennessee        |                                            |                                     |                                    |                                           |                                       |                                       |                                      |                                        |                                    |                                        |                                       |                                        |                                   |                                      |                                      |                                      |                                     |                                         |                                           |                                            |                                      |                                      |                                      |                                          |                                        |                                     |                                      |                                         |                                              |                                     |                                       |                                      |                                           |                                    |                                         |                                    |                                       |                                   |                                      |                                          |                                     |                                      |                                     |                                          |  |                                     |                                      |                                            |  |                                                                                                                                                                                                                                                                                                                                                                                                                                                                                                                                                                                                                                             |
| 04 <input type="checkbox"/> Arkansas                                                                                                                                                                                                                                                                                                                                                                                                                                                                                                                                                                                                                                                                                                                                                                                                                                                                                                                                                                                                                                                                                                                                                                                                                                                                                                                                                                                                                                                                                                                                                                                                                                                                                                                                                                                                                                                                                                                                                                                                                                                                                                                                                                                                                                                                                                                                                                                                                                                                                                                                                                                                                     | 17 <input type="checkbox"/> Kentucky      | 30 <input type="checkbox"/> New Jersey     | 43 <input type="checkbox"/> Texas            |                                            |                                     |                                    |                                           |                                       |                                       |                                      |                                        |                                    |                                        |                                       |                                        |                                   |                                      |                                      |                                      |                                     |                                         |                                           |                                            |                                      |                                      |                                      |                                          |                                        |                                     |                                      |                                         |                                              |                                     |                                       |                                      |                                           |                                    |                                         |                                    |                                       |                                   |                                      |                                          |                                     |                                      |                                     |                                          |  |                                     |                                      |                                            |  |                                                                                                                                                                                                                                                                                                                                                                                                                                                                                                                                                                                                                                             |
| 05 <input type="checkbox"/> California                                                                                                                                                                                                                                                                                                                                                                                                                                                                                                                                                                                                                                                                                                                                                                                                                                                                                                                                                                                                                                                                                                                                                                                                                                                                                                                                                                                                                                                                                                                                                                                                                                                                                                                                                                                                                                                                                                                                                                                                                                                                                                                                                                                                                                                                                                                                                                                                                                                                                                                                                                                                                   | 18 <input type="checkbox"/> Louisiana     | 31 <input type="checkbox"/> New Mexico     | 44 <input type="checkbox"/> Utah             |                                            |                                     |                                    |                                           |                                       |                                       |                                      |                                        |                                    |                                        |                                       |                                        |                                   |                                      |                                      |                                      |                                     |                                         |                                           |                                            |                                      |                                      |                                      |                                          |                                        |                                     |                                      |                                         |                                              |                                     |                                       |                                      |                                           |                                    |                                         |                                    |                                       |                                   |                                      |                                          |                                     |                                      |                                     |                                          |  |                                     |                                      |                                            |  |                                                                                                                                                                                                                                                                                                                                                                                                                                                                                                                                                                                                                                             |
| 06 <input type="checkbox"/> Colorado                                                                                                                                                                                                                                                                                                                                                                                                                                                                                                                                                                                                                                                                                                                                                                                                                                                                                                                                                                                                                                                                                                                                                                                                                                                                                                                                                                                                                                                                                                                                                                                                                                                                                                                                                                                                                                                                                                                                                                                                                                                                                                                                                                                                                                                                                                                                                                                                                                                                                                                                                                                                                     | 19 <input type="checkbox"/> Maine         | 32 <input type="checkbox"/> New York       | 45 <input type="checkbox"/> Vermont          |                                            |                                     |                                    |                                           |                                       |                                       |                                      |                                        |                                    |                                        |                                       |                                        |                                   |                                      |                                      |                                      |                                     |                                         |                                           |                                            |                                      |                                      |                                      |                                          |                                        |                                     |                                      |                                         |                                              |                                     |                                       |                                      |                                           |                                    |                                         |                                    |                                       |                                   |                                      |                                          |                                     |                                      |                                     |                                          |  |                                     |                                      |                                            |  |                                                                                                                                                                                                                                                                                                                                                                                                                                                                                                                                                                                                                                             |
| 07 <input type="checkbox"/> Connecticut                                                                                                                                                                                                                                                                                                                                                                                                                                                                                                                                                                                                                                                                                                                                                                                                                                                                                                                                                                                                                                                                                                                                                                                                                                                                                                                                                                                                                                                                                                                                                                                                                                                                                                                                                                                                                                                                                                                                                                                                                                                                                                                                                                                                                                                                                                                                                                                                                                                                                                                                                                                                                  | 20 <input type="checkbox"/> Massachusetts | 33 <input type="checkbox"/> North Carolina | 46 <input type="checkbox"/> Virginia         |                                            |                                     |                                    |                                           |                                       |                                       |                                      |                                        |                                    |                                        |                                       |                                        |                                   |                                      |                                      |                                      |                                     |                                         |                                           |                                            |                                      |                                      |                                      |                                          |                                        |                                     |                                      |                                         |                                              |                                     |                                       |                                      |                                           |                                    |                                         |                                    |                                       |                                   |                                      |                                          |                                     |                                      |                                     |                                          |  |                                     |                                      |                                            |  |                                                                                                                                                                                                                                                                                                                                                                                                                                                                                                                                                                                                                                             |
| 08 <input type="checkbox"/> Delaware                                                                                                                                                                                                                                                                                                                                                                                                                                                                                                                                                                                                                                                                                                                                                                                                                                                                                                                                                                                                                                                                                                                                                                                                                                                                                                                                                                                                                                                                                                                                                                                                                                                                                                                                                                                                                                                                                                                                                                                                                                                                                                                                                                                                                                                                                                                                                                                                                                                                                                                                                                                                                     | 21 <input type="checkbox"/> Maryland      | 34 <input type="checkbox"/> North Dakota   | 47 <input type="checkbox"/> Washington       |                                            |                                     |                                    |                                           |                                       |                                       |                                      |                                        |                                    |                                        |                                       |                                        |                                   |                                      |                                      |                                      |                                     |                                         |                                           |                                            |                                      |                                      |                                      |                                          |                                        |                                     |                                      |                                         |                                              |                                     |                                       |                                      |                                           |                                    |                                         |                                    |                                       |                                   |                                      |                                          |                                     |                                      |                                     |                                          |  |                                     |                                      |                                            |  |                                                                                                                                                                                                                                                                                                                                                                                                                                                                                                                                                                                                                                             |
| 09 <input type="checkbox"/> Florida                                                                                                                                                                                                                                                                                                                                                                                                                                                                                                                                                                                                                                                                                                                                                                                                                                                                                                                                                                                                                                                                                                                                                                                                                                                                                                                                                                                                                                                                                                                                                                                                                                                                                                                                                                                                                                                                                                                                                                                                                                                                                                                                                                                                                                                                                                                                                                                                                                                                                                                                                                                                                      | 22 <input type="checkbox"/> Michigan      | 35 <input type="checkbox"/> Ohio           | 48 <input type="checkbox"/> Washington, D.C. |                                            |                                     |                                    |                                           |                                       |                                       |                                      |                                        |                                    |                                        |                                       |                                        |                                   |                                      |                                      |                                      |                                     |                                         |                                           |                                            |                                      |                                      |                                      |                                          |                                        |                                     |                                      |                                         |                                              |                                     |                                       |                                      |                                           |                                    |                                         |                                    |                                       |                                   |                                      |                                          |                                     |                                      |                                     |                                          |  |                                     |                                      |                                            |  |                                                                                                                                                                                                                                                                                                                                                                                                                                                                                                                                                                                                                                             |
| 10 <input type="checkbox"/> Georgia                                                                                                                                                                                                                                                                                                                                                                                                                                                                                                                                                                                                                                                                                                                                                                                                                                                                                                                                                                                                                                                                                                                                                                                                                                                                                                                                                                                                                                                                                                                                                                                                                                                                                                                                                                                                                                                                                                                                                                                                                                                                                                                                                                                                                                                                                                                                                                                                                                                                                                                                                                                                                      | 23 <input type="checkbox"/> Minnesota     | 36 <input type="checkbox"/> Oklahoma       | 49 <input type="checkbox"/> West Virginia    |                                            |                                     |                                    |                                           |                                       |                                       |                                      |                                        |                                    |                                        |                                       |                                        |                                   |                                      |                                      |                                      |                                     |                                         |                                           |                                            |                                      |                                      |                                      |                                          |                                        |                                     |                                      |                                         |                                              |                                     |                                       |                                      |                                           |                                    |                                         |                                    |                                       |                                   |                                      |                                          |                                     |                                      |                                     |                                          |  |                                     |                                      |                                            |  |                                                                                                                                                                                                                                                                                                                                                                                                                                                                                                                                                                                                                                             |
| 11 <input type="checkbox"/> Hawaii                                                                                                                                                                                                                                                                                                                                                                                                                                                                                                                                                                                                                                                                                                                                                                                                                                                                                                                                                                                                                                                                                                                                                                                                                                                                                                                                                                                                                                                                                                                                                                                                                                                                                                                                                                                                                                                                                                                                                                                                                                                                                                                                                                                                                                                                                                                                                                                                                                                                                                                                                                                                                       | 24 <input type="checkbox"/> Mississippi   | 37 <input type="checkbox"/> Oregon         | 50 <input type="checkbox"/> Wisconsin        |                                            |                                     |                                    |                                           |                                       |                                       |                                      |                                        |                                    |                                        |                                       |                                        |                                   |                                      |                                      |                                      |                                     |                                         |                                           |                                            |                                      |                                      |                                      |                                          |                                        |                                     |                                      |                                         |                                              |                                     |                                       |                                      |                                           |                                    |                                         |                                    |                                       |                                   |                                      |                                          |                                     |                                      |                                     |                                          |  |                                     |                                      |                                            |  |                                                                                                                                                                                                                                                                                                                                                                                                                                                                                                                                                                                                                                             |
| 12 <input type="checkbox"/> Idaho                                                                                                                                                                                                                                                                                                                                                                                                                                                                                                                                                                                                                                                                                                                                                                                                                                                                                                                                                                                                                                                                                                                                                                                                                                                                                                                                                                                                                                                                                                                                                                                                                                                                                                                                                                                                                                                                                                                                                                                                                                                                                                                                                                                                                                                                                                                                                                                                                                                                                                                                                                                                                        | 25 <input type="checkbox"/> Missouri      | 38 <input type="checkbox"/> Pennsylvania   | 51 <input type="checkbox"/> Wyoming          |                                            |                                     |                                    |                                           |                                       |                                       |                                      |                                        |                                    |                                        |                                       |                                        |                                   |                                      |                                      |                                      |                                     |                                         |                                           |                                            |                                      |                                      |                                      |                                          |                                        |                                     |                                      |                                         |                                              |                                     |                                       |                                      |                                           |                                    |                                         |                                    |                                       |                                   |                                      |                                          |                                     |                                      |                                     |                                          |  |                                     |                                      |                                            |  |                                                                                                                                                                                                                                                                                                                                                                                                                                                                                                                                                                                                                                             |
| 13 <input type="checkbox"/> Illinois                                                                                                                                                                                                                                                                                                                                                                                                                                                                                                                                                                                                                                                                                                                                                                                                                                                                                                                                                                                                                                                                                                                                                                                                                                                                                                                                                                                                                                                                                                                                                                                                                                                                                                                                                                                                                                                                                                                                                                                                                                                                                                                                                                                                                                                                                                                                                                                                                                                                                                                                                                                                                     | 26 <input type="checkbox"/> Montana       | 39 <input type="checkbox"/> Rhode Island   |                                              |                                            |                                     |                                    |                                           |                                       |                                       |                                      |                                        |                                    |                                        |                                       |                                        |                                   |                                      |                                      |                                      |                                     |                                         |                                           |                                            |                                      |                                      |                                      |                                          |                                        |                                     |                                      |                                         |                                              |                                     |                                       |                                      |                                           |                                    |                                         |                                    |                                       |                                   |                                      |                                          |                                     |                                      |                                     |                                          |  |                                     |                                      |                                            |  |                                                                                                                                                                                                                                                                                                                                                                                                                                                                                                                                                                                                                                             |
| 14 <input type="checkbox"/> Indiana                                                                                                                                                                                                                                                                                                                                                                                                                                                                                                                                                                                                                                                                                                                                                                                                                                                                                                                                                                                                                                                                                                                                                                                                                                                                                                                                                                                                                                                                                                                                                                                                                                                                                                                                                                                                                                                                                                                                                                                                                                                                                                                                                                                                                                                                                                                                                                                                                                                                                                                                                                                                                      | 27 <input type="checkbox"/> Nebraska      | 40 <input type="checkbox"/> South Carolina |                                              |                                            |                                     |                                    |                                           |                                       |                                       |                                      |                                        |                                    |                                        |                                       |                                        |                                   |                                      |                                      |                                      |                                     |                                         |                                           |                                            |                                      |                                      |                                      |                                          |                                        |                                     |                                      |                                         |                                              |                                     |                                       |                                      |                                           |                                    |                                         |                                    |                                       |                                   |                                      |                                          |                                     |                                      |                                     |                                          |  |                                     |                                      |                                            |  |                                                                                                                                                                                                                                                                                                                                                                                                                                                                                                                                                                                                                                             |
| <b>International (2a)</b><br><table style="width: 100%;"> <tr> <td>01 <input type="checkbox"/> Argentina</td> <td>08 <input type="checkbox"/> Denmark</td> <td>14 <input type="checkbox"/> Israel</td> <td>20 <input type="checkbox"/> New Zealand</td> <td>26 <input type="checkbox"/> Sweden</td> </tr> <tr> <td>02 <input type="checkbox"/> Australia</td> <td>09 <input type="checkbox"/> France</td> <td>15 <input type="checkbox"/> Japan</td> <td>21 <input type="checkbox"/> Norway</td> <td>27 <input type="checkbox"/> Taiwan</td> </tr> <tr> <td>03 <input type="checkbox"/> Austria</td> <td>10 <input type="checkbox"/> Germany</td> <td>16 <input type="checkbox"/> Korea</td> <td>22 <input type="checkbox"/> Portugal</td> <td>28 <input type="checkbox"/> Thailand</td> </tr> <tr> <td>04 <input type="checkbox"/> Belgium</td> <td>11 <input type="checkbox"/> India</td> <td>17 <input type="checkbox"/> Malaysia</td> <td>23 <input type="checkbox"/> Russia</td> <td>29 <input type="checkbox"/> United Kingdom</td> </tr> <tr> <td>05 <input type="checkbox"/> Brazil</td> <td>12 <input type="checkbox"/> Italy</td> <td>18 <input type="checkbox"/> Mexico</td> <td>24 <input type="checkbox"/> Spain</td> <td>2aa <input type="checkbox"/> Other:</td> </tr> <tr> <td>07 <input type="checkbox"/> China</td> <td>13 <input type="checkbox"/> Ireland</td> <td>19 <input type="checkbox"/> Netherlands</td> <td>25 <input type="checkbox"/> Switzerland</td> <td></td> </tr> </table>                                                                                                                                                                                                                                                                                                                                                                                                                                                                                                                                                                                                                                                                                                                                                                                                                                                                                                                                                                                                                                                                                                                                            |                                           |                                            |                                              | 01 <input type="checkbox"/> Argentina      | 08 <input type="checkbox"/> Denmark | 14 <input type="checkbox"/> Israel | 20 <input type="checkbox"/> New Zealand   | 26 <input type="checkbox"/> Sweden    | 02 <input type="checkbox"/> Australia | 09 <input type="checkbox"/> France   | 15 <input type="checkbox"/> Japan      | 21 <input type="checkbox"/> Norway | 27 <input type="checkbox"/> Taiwan     | 03 <input type="checkbox"/> Austria   | 10 <input type="checkbox"/> Germany    | 16 <input type="checkbox"/> Korea | 22 <input type="checkbox"/> Portugal | 28 <input type="checkbox"/> Thailand | 04 <input type="checkbox"/> Belgium  | 11 <input type="checkbox"/> India   | 17 <input type="checkbox"/> Malaysia    | 23 <input type="checkbox"/> Russia        | 29 <input type="checkbox"/> United Kingdom | 05 <input type="checkbox"/> Brazil   | 12 <input type="checkbox"/> Italy    | 18 <input type="checkbox"/> Mexico   | 24 <input type="checkbox"/> Spain        | 2aa <input type="checkbox"/> Other:    | 07 <input type="checkbox"/> China   | 13 <input type="checkbox"/> Ireland  | 19 <input type="checkbox"/> Netherlands | 25 <input type="checkbox"/> Switzerland      |                                     |                                       |                                      |                                           |                                    |                                         |                                    |                                       |                                   |                                      |                                          |                                     |                                      |                                     |                                          |  |                                     |                                      |                                            |  |                                                                                                                                                                                                                                                                                                                                                                                                                                                                                                                                                                                                                                             |
| 01 <input type="checkbox"/> Argentina                                                                                                                                                                                                                                                                                                                                                                                                                                                                                                                                                                                                                                                                                                                                                                                                                                                                                                                                                                                                                                                                                                                                                                                                                                                                                                                                                                                                                                                                                                                                                                                                                                                                                                                                                                                                                                                                                                                                                                                                                                                                                                                                                                                                                                                                                                                                                                                                                                                                                                                                                                                                                    | 08 <input type="checkbox"/> Denmark       | 14 <input type="checkbox"/> Israel         | 20 <input type="checkbox"/> New Zealand      | 26 <input type="checkbox"/> Sweden         |                                     |                                    |                                           |                                       |                                       |                                      |                                        |                                    |                                        |                                       |                                        |                                   |                                      |                                      |                                      |                                     |                                         |                                           |                                            |                                      |                                      |                                      |                                          |                                        |                                     |                                      |                                         |                                              |                                     |                                       |                                      |                                           |                                    |                                         |                                    |                                       |                                   |                                      |                                          |                                     |                                      |                                     |                                          |  |                                     |                                      |                                            |  |                                                                                                                                                                                                                                                                                                                                                                                                                                                                                                                                                                                                                                             |
| 02 <input type="checkbox"/> Australia                                                                                                                                                                                                                                                                                                                                                                                                                                                                                                                                                                                                                                                                                                                                                                                                                                                                                                                                                                                                                                                                                                                                                                                                                                                                                                                                                                                                                                                                                                                                                                                                                                                                                                                                                                                                                                                                                                                                                                                                                                                                                                                                                                                                                                                                                                                                                                                                                                                                                                                                                                                                                    | 09 <input type="checkbox"/> France        | 15 <input type="checkbox"/> Japan          | 21 <input type="checkbox"/> Norway           | 27 <input type="checkbox"/> Taiwan         |                                     |                                    |                                           |                                       |                                       |                                      |                                        |                                    |                                        |                                       |                                        |                                   |                                      |                                      |                                      |                                     |                                         |                                           |                                            |                                      |                                      |                                      |                                          |                                        |                                     |                                      |                                         |                                              |                                     |                                       |                                      |                                           |                                    |                                         |                                    |                                       |                                   |                                      |                                          |                                     |                                      |                                     |                                          |  |                                     |                                      |                                            |  |                                                                                                                                                                                                                                                                                                                                                                                                                                                                                                                                                                                                                                             |
| 03 <input type="checkbox"/> Austria                                                                                                                                                                                                                                                                                                                                                                                                                                                                                                                                                                                                                                                                                                                                                                                                                                                                                                                                                                                                                                                                                                                                                                                                                                                                                                                                                                                                                                                                                                                                                                                                                                                                                                                                                                                                                                                                                                                                                                                                                                                                                                                                                                                                                                                                                                                                                                                                                                                                                                                                                                                                                      | 10 <input type="checkbox"/> Germany       | 16 <input type="checkbox"/> Korea          | 22 <input type="checkbox"/> Portugal         | 28 <input type="checkbox"/> Thailand       |                                     |                                    |                                           |                                       |                                       |                                      |                                        |                                    |                                        |                                       |                                        |                                   |                                      |                                      |                                      |                                     |                                         |                                           |                                            |                                      |                                      |                                      |                                          |                                        |                                     |                                      |                                         |                                              |                                     |                                       |                                      |                                           |                                    |                                         |                                    |                                       |                                   |                                      |                                          |                                     |                                      |                                     |                                          |  |                                     |                                      |                                            |  |                                                                                                                                                                                                                                                                                                                                                                                                                                                                                                                                                                                                                                             |
| 04 <input type="checkbox"/> Belgium                                                                                                                                                                                                                                                                                                                                                                                                                                                                                                                                                                                                                                                                                                                                                                                                                                                                                                                                                                                                                                                                                                                                                                                                                                                                                                                                                                                                                                                                                                                                                                                                                                                                                                                                                                                                                                                                                                                                                                                                                                                                                                                                                                                                                                                                                                                                                                                                                                                                                                                                                                                                                      | 11 <input type="checkbox"/> India         | 17 <input type="checkbox"/> Malaysia       | 23 <input type="checkbox"/> Russia           | 29 <input type="checkbox"/> United Kingdom |                                     |                                    |                                           |                                       |                                       |                                      |                                        |                                    |                                        |                                       |                                        |                                   |                                      |                                      |                                      |                                     |                                         |                                           |                                            |                                      |                                      |                                      |                                          |                                        |                                     |                                      |                                         |                                              |                                     |                                       |                                      |                                           |                                    |                                         |                                    |                                       |                                   |                                      |                                          |                                     |                                      |                                     |                                          |  |                                     |                                      |                                            |  |                                                                                                                                                                                                                                                                                                                                                                                                                                                                                                                                                                                                                                             |
| 05 <input type="checkbox"/> Brazil                                                                                                                                                                                                                                                                                                                                                                                                                                                                                                                                                                                                                                                                                                                                                                                                                                                                                                                                                                                                                                                                                                                                                                                                                                                                                                                                                                                                                                                                                                                                                                                                                                                                                                                                                                                                                                                                                                                                                                                                                                                                                                                                                                                                                                                                                                                                                                                                                                                                                                                                                                                                                       | 12 <input type="checkbox"/> Italy         | 18 <input type="checkbox"/> Mexico         | 24 <input type="checkbox"/> Spain            | 2aa <input type="checkbox"/> Other:        |                                     |                                    |                                           |                                       |                                       |                                      |                                        |                                    |                                        |                                       |                                        |                                   |                                      |                                      |                                      |                                     |                                         |                                           |                                            |                                      |                                      |                                      |                                          |                                        |                                     |                                      |                                         |                                              |                                     |                                       |                                      |                                           |                                    |                                         |                                    |                                       |                                   |                                      |                                          |                                     |                                      |                                     |                                          |  |                                     |                                      |                                            |  |                                                                                                                                                                                                                                                                                                                                                                                                                                                                                                                                                                                                                                             |
| 07 <input type="checkbox"/> China                                                                                                                                                                                                                                                                                                                                                                                                                                                                                                                                                                                                                                                                                                                                                                                                                                                                                                                                                                                                                                                                                                                                                                                                                                                                                                                                                                                                                                                                                                                                                                                                                                                                                                                                                                                                                                                                                                                                                                                                                                                                                                                                                                                                                                                                                                                                                                                                                                                                                                                                                                                                                        | 13 <input type="checkbox"/> Ireland       | 19 <input type="checkbox"/> Netherlands    | 25 <input type="checkbox"/> Switzerland      |                                            |                                     |                                    |                                           |                                       |                                       |                                      |                                        |                                    |                                        |                                       |                                        |                                   |                                      |                                      |                                      |                                     |                                         |                                           |                                            |                                      |                                      |                                      |                                          |                                        |                                     |                                      |                                         |                                              |                                     |                                       |                                      |                                           |                                    |                                         |                                    |                                       |                                   |                                      |                                          |                                     |                                      |                                     |                                          |  |                                     |                                      |                                            |  |                                                                                                                                                                                                                                                                                                                                                                                                                                                                                                                                                                                                                                             |

**3. What mode of transportation did you use to enter Alaska?**

- |                                      |                                      |                                                 |
|--------------------------------------|--------------------------------------|-------------------------------------------------|
| <input type="checkbox"/> Air         | <input type="checkbox"/> Highway →   | <b>3a. What type of vehicle were you using?</b> |
| <input type="checkbox"/> State ferry | <input type="checkbox"/> Cruise ship | 1 <input type="checkbox"/> RV/Camper            |
| <input type="checkbox"/> Other _____ |                                      | 2 <input type="checkbox"/> Car/truck/van        |
|                                      |                                      | 3 <input type="checkbox"/> Motorcoach/bus       |
|                                      |                                      | 4 <input type="checkbox"/> Motorcycle           |
|                                      |                                      | 5 <input type="checkbox"/> Other _____          |

**4. Did you travel to more than one community while in Alaska?** 1  Yes 2  No (skip to Q5)

**4a. I'd like to ask you about the modes of transportation you used within Alaska, once you arrived. Which of the following modes of transportation did you use to travel between communities within Alaska?** (Read 1-8)

- |                                         |                                             |                                            |                                              |                                                |
|-----------------------------------------|---------------------------------------------|--------------------------------------------|----------------------------------------------|------------------------------------------------|
| 01 <input type="checkbox"/> Air         | 03 <input type="checkbox"/> Alaska Railroad | 05 <input type="checkbox"/> Rental vehicle | 07 <input type="checkbox"/> Personal vehicle | 09 <input type="checkbox"/> None of the above  |
| 02 <input type="checkbox"/> State ferry | 04 <input type="checkbox"/> Tour bus or van | 06 <input type="checkbox"/> Rental RV      | 08 <input type="checkbox"/> Personal RV      | 10 <input type="checkbox"/> Don't know/refused |

**5. Is this your first trip to Alaska?** 1  Yes (Skip to #8) 2  No

**6. Not including this trip, how many times have you been to Alaska for vacation?** \_\_\_\_\_  
 2  Used to live here 3  DK/Ref.

**7. Before this trip, had you ever traveled by cruise ship in Alaska?** 1  Yes 2  No

**8. On this current trip, how many nights total were you in Alaska?**  
 If you overnighted on a cruise ship or ferry, please include all nights on board. \_\_\_\_\_

9a. Where in Alaska did you stay each night while on your trip? (Show grid.)

9b. How many nights and what type of lodging?

|                                                                                                 | Hotel/<br>motel | Lodge | B&B | Vacation<br>rental | Friends/<br>Family | Campground/<br>RV | Wilderness<br>Camping | Cruise<br>Ship (9d) | State<br>Ferry (9c) | Other |                             |
|-------------------------------------------------------------------------------------------------|-----------------|-------|-----|--------------------|--------------------|-------------------|-----------------------|---------------------|---------------------|-------|-----------------------------|
| 01 <input type="checkbox"/> State ferry                                                         |                 |       |     |                    |                    |                   |                       |                     |                     |       |                             |
| 02 <input type="checkbox"/> Cruise ship                                                         |                 |       |     |                    |                    |                   |                       |                     |                     |       | 10.<br>DAY<br>VISIT<br>?    |
| 03 <input type="checkbox"/> Other vessel                                                        |                 |       |     |                    |                    |                   |                       |                     |                     |       |                             |
| 04 <input type="checkbox"/> Anchorage                                                           |                 |       |     |                    |                    |                   |                       |                     |                     |       | 04 <input type="checkbox"/> |
| 05 <input type="checkbox"/> Chicken                                                             |                 |       |     |                    |                    |                   |                       |                     |                     |       | 05 <input type="checkbox"/> |
| 06 <input type="checkbox"/> Coldfoot                                                            |                 |       |     |                    |                    |                   |                       |                     |                     |       | 06 <input type="checkbox"/> |
| 07 <input type="checkbox"/> Copper Center                                                       |                 |       |     |                    |                    |                   |                       |                     |                     |       | 07 <input type="checkbox"/> |
| 08 <input type="checkbox"/> Cordova                                                             |                 |       |     |                    |                    |                   |                       |                     |                     |       | 08 <input type="checkbox"/> |
| 09 <input type="checkbox"/> Delta Junction                                                      |                 |       |     |                    |                    |                   |                       |                     |                     |       | 09 <input type="checkbox"/> |
| 10 <input type="checkbox"/> Denali Nat'l Park                                                   |                 |       |     |                    |                    |                   |                       |                     |                     |       | 10 <input type="checkbox"/> |
| 11 <input type="checkbox"/> Fairbanks                                                           |                 |       |     |                    |                    |                   |                       |                     |                     |       | 11 <input type="checkbox"/> |
| 12 <input type="checkbox"/> Girdwood/Alyeska                                                    |                 |       |     |                    |                    |                   |                       |                     |                     |       | 12 <input type="checkbox"/> |
| 13 <input type="checkbox"/> Glacier Bay Nat'l Park                                              |                 |       |     |                    |                    |                   |                       |                     |                     |       | 13 <input type="checkbox"/> |
| 14 <input type="checkbox"/> Glennallen                                                          |                 |       |     |                    |                    |                   |                       |                     |                     |       | 14 <input type="checkbox"/> |
| 15 <input type="checkbox"/> Gustavus                                                            |                 |       |     |                    |                    |                   |                       |                     |                     |       | 15 <input type="checkbox"/> |
| 16 <input type="checkbox"/> Haines                                                              |                 |       |     |                    |                    |                   |                       |                     |                     |       | 16 <input type="checkbox"/> |
| 17 <input type="checkbox"/> Healy                                                               |                 |       |     |                    |                    |                   |                       |                     |                     |       | 17 <input type="checkbox"/> |
| 18 <input type="checkbox"/> Homer                                                               |                 |       |     |                    |                    |                   |                       |                     |                     |       | 18 <input type="checkbox"/> |
| 19 <input type="checkbox"/> Hoonah/Icy Strait Pt                                                |                 |       |     |                    |                    |                   |                       |                     |                     |       | 19 <input type="checkbox"/> |
| 20 <input type="checkbox"/> Juneau                                                              |                 |       |     |                    |                    |                   |                       |                     |                     |       | 20 <input type="checkbox"/> |
| 21 <input type="checkbox"/> Kenai/Soldotna                                                      |                 |       |     |                    |                    |                   |                       |                     |                     |       | 21 <input type="checkbox"/> |
| 22 <input type="checkbox"/> Kenai Peninsula:<br>Cooper Landing / Hope /<br>Ninilchik / Sterling |                 |       |     |                    |                    |                   |                       |                     |                     |       | 22 <input type="checkbox"/> |
| 23 <input type="checkbox"/> Ketchikan                                                           |                 |       |     |                    |                    |                   |                       |                     |                     |       | 23 <input type="checkbox"/> |
| 24 <input type="checkbox"/> Kodiak                                                              |                 |       |     |                    |                    |                   |                       |                     |                     |       | 24 <input type="checkbox"/> |
| 25 <input type="checkbox"/> Nome                                                                |                 |       |     |                    |                    |                   |                       |                     |                     |       | 25 <input type="checkbox"/> |
| 26 <input type="checkbox"/> Palmer/Wasilla                                                      |                 |       |     |                    |                    |                   |                       |                     |                     |       | 26 <input type="checkbox"/> |
| 27 <input type="checkbox"/> Petersburg                                                          |                 |       |     |                    |                    |                   |                       |                     |                     |       | 27 <input type="checkbox"/> |
| 28 <input type="checkbox"/> Portage                                                             |                 |       |     |                    |                    |                   |                       |                     |                     |       | 28 <input type="checkbox"/> |
| 29 <input type="checkbox"/> Prince of Wales Is.                                                 |                 |       |     |                    |                    |                   |                       |                     |                     |       | 29 <input type="checkbox"/> |
| 30 <input type="checkbox"/> Prince William Sound                                                |                 |       |     |                    |                    |                   |                       |                     |                     |       | 30 <input type="checkbox"/> |
| 31 <input type="checkbox"/> Seward                                                              |                 |       |     |                    |                    |                   |                       |                     |                     |       | 31 <input type="checkbox"/> |
| 32 <input type="checkbox"/> Sitka                                                               |                 |       |     |                    |                    |                   |                       |                     |                     |       | 32 <input type="checkbox"/> |
| 33 <input type="checkbox"/> Skagway                                                             |                 |       |     |                    |                    |                   |                       |                     |                     |       | 33 <input type="checkbox"/> |
| 34 <input type="checkbox"/> Talkeetna                                                           |                 |       |     |                    |                    |                   |                       |                     |                     |       | 34 <input type="checkbox"/> |
| 35 <input type="checkbox"/> Tok                                                                 |                 |       |     |                    |                    |                   |                       |                     |                     |       | 35 <input type="checkbox"/> |
| 36 <input type="checkbox"/> Valdez                                                              |                 |       |     |                    |                    |                   |                       |                     |                     |       | 36 <input type="checkbox"/> |
| 37 <input type="checkbox"/> Whittier                                                            |                 |       |     |                    |                    |                   |                       |                     |                     |       | 37 <input type="checkbox"/> |
| 38 <input type="checkbox"/> Wrangell                                                            |                 |       |     |                    |                    |                   |                       |                     |                     |       | 38 <input type="checkbox"/> |
| 39 <input type="checkbox"/> Other (1)                                                           |                 |       |     |                    |                    |                   |                       |                     |                     |       | 39 <input type="checkbox"/> |
| 40 <input type="checkbox"/> Other (2)                                                           |                 |       |     |                    |                    |                   |                       |                     |                     |       | 40 <input type="checkbox"/> |
| 41 <input type="checkbox"/> Other (3)                                                           |                 |       |     |                    |                    |                   |                       |                     |                     |       | 41 <input type="checkbox"/> |
| 42 <input type="checkbox"/> Other (4)                                                           |                 |       |     |                    |                    |                   |                       |                     |                     |       | 42 <input type="checkbox"/> |

10. Did you visit any communities or destinations without spending the night? 44  None OR \_\_\_\_\_ ↑

**NON-CRUISE VISITORS ONLY (INCLUDES AMHS)**

11. Excluding transportation to and from Alaska, can you estimate how much your traveling party spent on your entire Alaska trip? Your traveling party are those with whom you shared expenses. \$ \_\_\_\_\_  
 2  Don't know 3  Ref.  
 4  CHECK HERE if amount includes transportation because respondent was unable to separate transportation costs.
12. Did your party purchase any multi-day packages that included lodging, transportation, and activities?  
 1  Yes  $\implies$  12a. Which of the following best describes this package? (Read 1-6)  
 01  Fishing lodge package 04  Rail package  
 02  Wilderness lodge package 05  Rental car or RV package  
 03  Motorcoach tour 06  Adventure tour (hiking, biking, kayaking, rafting)  
 07  Other \_\_\_\_\_  
 2  No  
 3  Don't know  
 4  Refused
- 12b. Which portions of your trip were included in this package? (Show list)  
 01  Air 03  Meals 05  Railroad 07  Vehicle/RV rental 09  Fishing  
 02  Lodging 04  Tours 06  Ferry 08  Bus/motorcoach 10  Other \_\_\_\_\_
- 12c. Can you estimate the price per person for this package? \$ \_\_\_\_\_ 2  Don't know 3  Ref.  
 4  CHECK HERE if amount applies to party.

**STATE FERRY PASSENGERS ONLY**

13. Can you estimate the price per person for your ferry tickets? \$ \_\_\_\_\_ 2  Don't know 3  Ref.  
 4  CHECK HERE if amount applies to party.

**CRUISE VISITORS ONLY**

14. What was the name of your cruise line? \_\_\_\_\_ 2  Don't know 3  Ref.
15. Which of the following best describes your Alaska trip? (Read 1-4)  
 1  Round trip cruise from Vancouver, Seattle, or San Francisco (skip to Q17)  
 2  Cruise one-way, fly one-way  
 3  Cruise with an overnight Alaska land tour  
 4  In-state or small ship cruise  
 5  Other \_\_\_\_\_
16. Did you spend any nights in Alaska on your own, in addition to your cruise or land tour package?  
 1  Yes 2  No 3  Don't know
17. Can you estimate the price per person for your cruise or cruise/tour package? \$ \_\_\_\_\_ 2  Don't know 3  Ref.  
 4  CHECK HERE if amount applies to party.  
 17a. Did this price include airfare? 1  Yes 2  No 3  Don't know 4  Ref.
18. Can you estimate what your traveling party spent on the rest of your Alaska trip? Please include tours your party bought before and during your trip. \$ \_\_\_\_\_ 2  Don't know 3  Ref.

19. Now I'd like to ask you about your party's spending in each community. Let's start with (community). While in (community), about how much did your party spend on lodging? Show categories.  
 If "none," enter \$0. If "don't know," enter DK.

| Include all communities from Q9/10 | Lodging | Tours Activities Entertainment | Gifts Souvenirs Clothing | Food Beverage | Rental Cars Fuel Transportation | Other (inc. package if in 1 community) |
|------------------------------------|---------|--------------------------------|--------------------------|---------------|---------------------------------|----------------------------------------|
| a.                                 | \$      | \$                             | \$                       | \$            | \$                              | \$                                     |
| b.                                 | \$      | \$                             | \$                       | \$            | \$                              | \$                                     |
| c.                                 | \$      | \$                             | \$                       | \$            | \$                              | \$                                     |
| d.                                 | \$      | \$                             | \$                       | \$            | \$                              | \$                                     |
| e.                                 | \$      | \$                             | \$                       | \$            | \$                              | \$                                     |
| f.                                 | \$      | \$                             | \$                       | \$            | \$                              | \$                                     |
| g.                                 | \$      | \$                             | \$                       | \$            | \$                              | \$                                     |
| h.                                 | \$      | \$                             | \$                       | \$            | \$                              | \$                                     |
| i.                                 | \$      | \$                             | \$                       | \$            | \$                              | \$                                     |
| j.                                 | \$      | \$                             | \$                       | \$            | \$                              | \$                                     |
| k.                                 | \$      | \$                             | \$                       | \$            | \$                              | \$                                     |
| l.                                 | \$      | \$                             | \$                       | \$            | \$                              | \$                                     |
| m.                                 | \$      | \$                             | \$                       | \$            | \$                              | \$                                     |
| n.                                 | \$      | \$                             | \$                       | \$            | \$                              | \$                                     |
| o.                                 | \$      | \$                             | \$                       | \$            | \$                              | \$                                     |

| 20. Which tours or activities did you participate in while in Alaska? (Show list)                       | 21. Where did you participate in these activities? |
|---------------------------------------------------------------------------------------------------------|----------------------------------------------------|
| 01 <input type="checkbox"/> ATV/4-wheeling/ORV/Jeep                                                     |                                                    |
| 02 <input type="checkbox"/> Biking                                                                      |                                                    |
| 03 <input type="checkbox"/> Bird watching                                                               |                                                    |
| 04 <input type="checkbox"/> Business                                                                    |                                                    |
| 05 <input type="checkbox"/> Camping                                                                     |                                                    |
| 06 <input type="checkbox"/> City/sightseeing tours                                                      |                                                    |
| 07 <input type="checkbox"/> Day cruises      whale watch,<br>wildlife, glacier, riverboat, jet boat     |                                                    |
| 08 <input type="checkbox"/> Dog sledding/kennel tour                                                    |                                                    |
| 09 <input type="checkbox"/> Fishing (guided)                                                            |                                                    |
| 10 <input type="checkbox"/> Fishing (unguided)                                                          |                                                    |
| 11 <input type="checkbox"/> Flightseeing                                                                |                                                    |
| 12 <input type="checkbox"/> Gold panning/mine tour                                                      |                                                    |
| 13 <input type="checkbox"/> Hiking/nature walk                                                          |                                                    |
| 14 <input type="checkbox"/> Historical/cultural attractions<br>Pioneer Park, festivals, Russian history |                                                    |
| 15 <input type="checkbox"/> Hot springs                                                                 |                                                    |
| 16 <input type="checkbox"/> Native cultural tours/activities                                            |                                                    |
| 17 <input type="checkbox"/> Hunting                                                                     |                                                    |
| 18 <input type="checkbox"/> Kayaking/canoeing                                                           |                                                    |
| 19 <input type="checkbox"/> Museums                                                                     |                                                    |
| 20 <input type="checkbox"/> Northern Lights viewing                                                     |                                                    |
| 21 <input type="checkbox"/> Rafting                                                                     |                                                    |
| 22 <input type="checkbox"/> Salmon bake/crab feed                                                       |                                                    |
| 23 <input type="checkbox"/> Shopping                                                                    |                                                    |
| 24 <input type="checkbox"/> Shows/Alaska entertainment                                                  |                                                    |
| 25 <input type="checkbox"/> Train – Alaska Railroad                                                     |                                                    |
| 26 <input type="checkbox"/> Train – White Pass/Yukon                                                    | <b>SKAGWAY</b>                                     |
| 27 <input type="checkbox"/> Tramway/gondola                                                             |                                                    |
| 28 <input type="checkbox"/> Wildlife viewing                                                            |                                                    |
| 29 <input type="checkbox"/> Zip-line                                                                    |                                                    |
| 30 <input type="checkbox"/> Other activity:                                                             |                                                    |
| 31 <input type="checkbox"/> Other activity:                                                             |                                                    |
| 32 <input type="checkbox"/> Other activity:                                                             |                                                    |

**(SKIP Q22-Q23 FOR BUSINESS-ONLY TRAVELERS)**

**22. How well did your trip to Alaska live up to what you expected from an Alaska vacation? Was it...** (Read 1-5)

- 1  Much higher than expectations    3  About what you expected    4  Below expectations    6  Don't know  
 2  Higher than expectations    5  Far below expectations    7  Refused

**23. In terms of value for the money, how does Alaska compare with other vacation destinations you've visited in the past five years? Was it...** (Read 1-5)

- 1  Much better    3  About the same    4  Worse    6  Don't know  
 2  Better    5  Much worse    7  Refused

**24. How satisfied were you with your overall experience in Alaska? Were you...** (Read 1,2,4,5)

- 1  Very satisfied    3  Neither/neutral    4  Dissatisfied    6  Don't know  
 2  Satisfied    5  Very dissatisfied    7  Refused

**25. How likely are you to recommend Alaska as a vacation destination to others?** (Read 1-4)

- 1  Very likely    3  Unlikely    5  Don't know  
 2  Likely    4  Very unlikely    6  Refused

**26. How likely are you to return to Alaska in the next five years?** (Read 1-4)

- 1  Very likely (**ASK 26a**)    3  Unlikely    5  Don't know  
 2  Likely    4  Very unlikely    6  Refused

**26a. What are you most interested in experiencing on your next Alaska trip?** (Check only one)

- 01  Arctic    05  Fishing    09  Hiking    13  Wildlife    16  Don't know  
 02  Camping    06  Flightseeing    10  Native culture    14  Winter    17  Refused  
 03  Cruise    07  Friends/family    11  Northern Lights    15  Other \_\_\_\_\_  
 04  Denali    08  Glaciers    12  Train

**27. How far in advance did you decide to come on this trip to Alaska?** \_\_\_\_\_ # of months OR 2  < 1 month  
 3  Don't know

**28. How far in advance did you book your major travel arrangements?** \_\_\_\_\_ # of months OR 2  < 1 month  
 3  Did not book anything    4  Don't know

**29. Did you use the internet, including any apps, to plan or book any portion of your Alaska trip?**

- 1  Yes    2  No (**Skip to Q34**)    3  Don't know (**Skip to Q34**)

**30. Did you visit the official State of Alaska travel website [travelalaska.com](http://travelalaska.com)?**

- 1  Yes    2  No    3  Don't know    4  Refused

**31. Which other websites or apps did you use in planning your Alaska trip?** (Show list) 1  Don't know (**Skip to Q34**)

**32. Which of these sites did you use to book portions of your Alaska trip?**

- 1  None/did not book online (**Skip to Q34**)    2  Don't know (**Skip to Q34**)

|                           | 31. Planned | 32. Booked |                          | 31. Planned | 32. Booked |
|---------------------------|-------------|------------|--------------------------|-------------|------------|
| a. AAA.com                | 1           | 2          | q. Hotwire               | 1           | 2          |
| b. AirBnB                 | 1           | 2          | r. Instagram             | 1           | 2          |
| c. Airline websites       | 1           | 2          | s. Kayak.com             | 1           | 2          |
| d. Alaska Marine Highway  | 1           | 2          | t. LonelyPlanet.com      | 1           | 2          |
| e. Alaska App             | 1           | 2          | u. Orbitz                | 1           | 2          |
| f. Booking.com            | 1           | 2          | v. Priceline             | 1           | 2          |
| g. Car/RV rental websites | 1           | 2          | w. Tour company websites | 1           | 2          |
| h. CruiseCritic.com       | 1           | 2          | x. Travelocity           | 1           | 2          |
| i. Cruise line websites   | 1           | 2          | y. Trip Advisor          | 1           | 2          |
| j. Expedia                | 1           | 2          | z. Twitter               | 1           | 2          |
| k. Facebook               | 1           | 2          | aa. Visitors Bureaus     | 1           | 2          |
| l. Google                 | 1           | 2          | bb. VRBO                 | 1           | 2          |
| m. Hipmunk                | 1           | 2          | cc. Yelp                 | 1           | 2          |
| n. HotelTonight           | 1           | 2          | dd. Other _____          | 1           | 2          |
| o. Hotels.com             | 1           | 2          | dd. Other _____          | 1           | 2          |
| p. Hotel/lodging websites | 1           | 2          | dd. Other _____          | 1           | 2          |

**33. Which portions of your trip did you book online, including through apps?**

- 01  Airfare    03  Tours    05  Cruise    07  Overnight packages    09  DK/R  
 02  Lodging    04  Vehicle rental    06  Ferry    08  Other \_\_\_\_\_

**34. Did you book any portion of your trip through a travel agent?**

- 1  Yes → **34a. Which portions of your trip did you book through a travel agent?**  
 2  No                      01  Airfare            03  Tours              05  Cruise    07  Overnight packages    09  DK/R  
 3  Don't know              02  Lodging            04  Vehicle rental      06  Ferry        08  Other \_\_\_\_\_  
 4  Refused

**35. Did you receive the State of Alaska Official Vacation Planner?**

- 1  Yes    2  No    3  Don't know    4  Refused

**36. What other sources did you use to get information about Alaska not including online sources? (Show list)**

- |                                                            |                                                       |                                                           |
|------------------------------------------------------------|-------------------------------------------------------|-----------------------------------------------------------|
| 01 <input type="checkbox"/> AAA                            | 08 <input type="checkbox"/> Friends/family/co-workers | 16 <input type="checkbox"/> Travel/recreation exhibitions |
| 02 <input type="checkbox"/> Brochures                      | 09 <input type="checkbox"/> Hotel/lodge               | 17 <input type="checkbox"/> Milepost                      |
| 03 <input type="checkbox"/> Club/organization/church       | 10 <input type="checkbox"/> Library                   | 18 <input type="checkbox"/> North to Alaska Guide         |
| 04 <input type="checkbox"/> Community brochures            | 11 <input type="checkbox"/> Magazine                  | 19 <input type="checkbox"/> Other travel guide/book       |
| 05 <input type="checkbox"/> Convention & Visitor Bureau(s) | 12 <input type="checkbox"/> Newspaper                 | 20 <input type="checkbox"/> Other                         |
| 06 <input type="checkbox"/> Cruise line                    | 13 <input type="checkbox"/> Prior experience          | 21 <input type="checkbox"/> Other                         |
| 07 <input type="checkbox"/> Ferry brochure/schedule        | 14 <input type="checkbox"/> Television                | 22 <input type="checkbox"/> None                          |
|                                                            | 15 <input type="checkbox"/> Tour company              | 23 <input type="checkbox"/> Don't know/refused            |

**37. Including yourself, how many people are traveling in your immediate party?**

By party, I mean those sharing expenses such as food, lodging, and transportation. \_\_\_\_\_

**38. Including yourself, what is the total number of people traveling in your group?**

By group, I mean friends or relatives that are traveling with you. \_\_\_\_\_

**39. What are the ages and gender of the \_\_\_\_\_ people in your traveling party? (Enter first 8 members of party only)**

|             | 39a. |        | 39b. |             | 39a. |        | 39b. |
|-------------|------|--------|------|-------------|------|--------|------|
|             | Male | Female | Age  |             | Male | Female | Age  |
| Yourself #1 | 1    | 2      |      | Traveler #5 | 1    | 2      |      |
| Traveler #2 | 1    | 2      |      | Traveler #6 | 1    | 2      |      |
| Traveler #3 | 1    | 2      |      | Traveler #7 | 1    | 2      |      |
| Traveler #4 | 1    | 2      |      | Traveler #8 | 1    | 2      |      |

**40. Which of these party members did most of the planning for this Alaska trip? Traveler # \_\_\_\_\_ 1  DK/Ref.**

**41. Are there children living in your household?**    1  Yes    2  No    3  Don't know    4  Refused

**42. Are you retired, or semi-retired?**                      1  Yes    2  No    3  Don't know    4  Refused

**43. Please point to the highest level of education you had the opportunity to complete.**

- |                                                      |                                                        |                                                    |
|------------------------------------------------------|--------------------------------------------------------|----------------------------------------------------|
| 01 <input type="checkbox"/> Grade 11 or less         | 03 <input type="checkbox"/> Associate/technical degree | 05 <input type="checkbox"/> Graduated from college |
| 02 <input type="checkbox"/> High school graduate/GED | 04 <input type="checkbox"/> Some college               | 06 <input type="checkbox"/> Masters/Doctorate      |
| 07 <input type="checkbox"/> Don't know               |                                                        |                                                    |
| 08 <input type="checkbox"/> Other _____              |                                                        |                                                    |
| 09 <input type="checkbox"/> Refused                  |                                                        |                                                    |

**44. Please point to the category that best describes your household. (Before-tax income, US\$)**

- |                                                  |                                                    |                                                    |
|--------------------------------------------------|----------------------------------------------------|----------------------------------------------------|
| 01 <input type="checkbox"/> Less than \$25,000   | 04 <input type="checkbox"/> \$75,000 to \$100,000  | 07 <input type="checkbox"/> \$150,000 to \$200,000 |
| 02 <input type="checkbox"/> \$25,000 to \$50,000 | 05 <input type="checkbox"/> \$100,000 to \$125,000 | 08 <input type="checkbox"/> More than \$200,000    |
| 03 <input type="checkbox"/> \$50,000 to \$75,000 | 06 <input type="checkbox"/> \$125,000 to \$150,000 | <input type="checkbox"/> Other currency: _____     |
| 09 <input type="checkbox"/> Don't know           |                                                    |                                                    |
| 10 <input type="checkbox"/> Refused              |                                                    |                                                    |

**45. The State of Alaska may wish to contact you in the future to find out more about your Alaska experiences. Would you be willing to provide your email address? Your information would not be shared or used for any purposes other than visitor research.**

- 01  Yes \_\_\_\_\_    02  No    03  Don't have email

***Thank you!***
